# Supplementary material for: Soft diphosphine and diarsine complexes of niobium(v) and tantalum(v) fluorides: synthesis, properties, structures and comparisons with the corresponding chlorides
Source: Royal Society of Chemistry journal article supplement (doi:10.1039/c4dt01029a), 2014-01-01
Supplement: c4dt01029a1.pdf [file c4dt01029a1.pdf]

## ESI

### Soft diphosphine and diarsine complexes of niobium(V) and tantalum(V) fluorides: synthesis, properties and comparisons with the corresponding chlorides.

W. Levason, M. E. Light, G. Reid and W. Zhang

**[NbCl<sub>4</sub>{*o*-C<sub>6</sub>H<sub>4</sub>(AsMe<sub>2</sub>)<sub>2</sub>]<sub>2</sub>][NbCl<sub>5</sub>(OEt)]**. Orange-red crystals of [NbCl<sub>4</sub>{*o*-C<sub>6</sub>H<sub>4</sub>(AsMe<sub>2</sub>)<sub>2</sub>]<sub>2</sub>][NbCl<sub>5</sub>(OEt)] were grown from a CH<sub>2</sub>Cl<sub>2</sub> solution of [NbCl<sub>4</sub>{*o*-C<sub>6</sub>H<sub>4</sub>(AsMe<sub>2</sub>)<sub>2</sub>]<sub>2</sub>][NbCl<sub>6</sub>] by vapour diffusion of diethyl ether. The ethoxide group either comes from EtOH impurity in the diethyl ether or by C-O bond cleavage in the ether. The complex is isomorphous with [TaCl<sub>4</sub>{*o*-C<sub>6</sub>H<sub>4</sub>(AsMe<sub>2</sub>)<sub>2</sub>]<sub>2</sub>][TaCl<sub>5</sub>(OEt)].<sup>S1</sup>

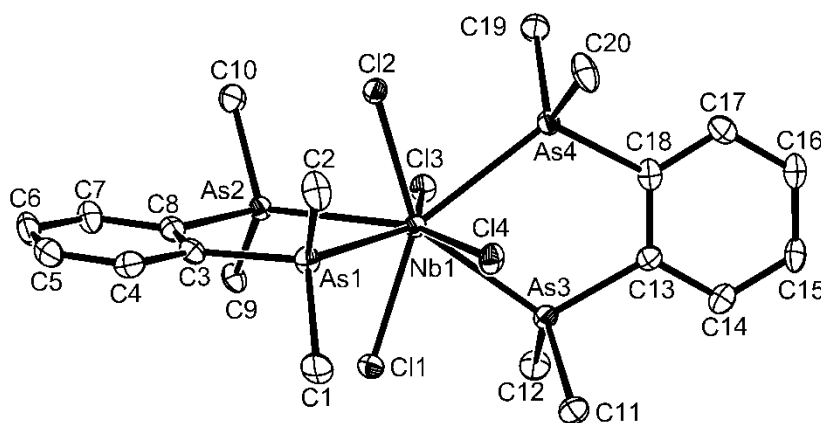

Fig. S1 The cation in [NbCl<sub>4</sub>{*o*-C<sub>6</sub>H<sub>4</sub>(AsMe<sub>2</sub>)<sub>2</sub>]<sub>2</sub>][NbCl<sub>5</sub>(OEt)]. ORTEP drawn with 50% probability level ellipsoids. Selected bond lengths (Å) and angles (°): Nb1—Cl2 = 2.4215(16), Nb1—Cl4 = 2.4277(14), Nb1—Cl1 = 2.4370(15), Nb1—Cl3 = 2.4399(15), Nb1—As2 = 2.7302(13), Nb1—As3 = 2.7351(14), Nb1—As1 = 2.7491(10), Nb1—As4 = 2.7501(11), As2—Nb1—As1 = 73.03(3), As3—Nb1—As4 = 72.66(3), Cl2—Nb1—Cl4 = 94.04(5), Cl4—Nb1—Cl1 = 95.47(5), Cl2—Nb1—Cl3 = 95.54(5), Cl1—Nb1—Cl3 = 94.37(5).

**[NbCl<sub>4</sub>{*o*-C<sub>6</sub>H<sub>4</sub>(PMe<sub>2</sub>)<sub>2</sub>]<sub>2</sub>][NbOCl<sub>4</sub>(MeCN)]**: crystals were obtained as described in the main text. The cation geometry is essentially identical to that described for [NbCl<sub>4</sub>{*o*-C<sub>6</sub>H<sub>4</sub>(PMe<sub>2</sub>)<sub>2</sub>]<sub>2</sub>]Cl and the anion is a distorted octahedron.

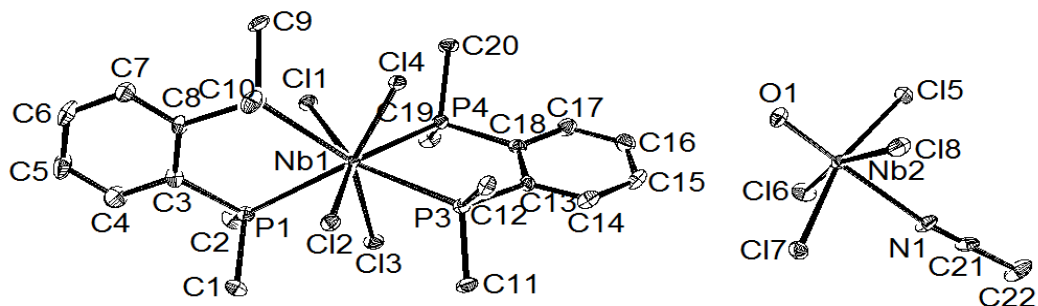

Fig. S2. The ions of  $[\text{NbCl}_4\{\text{o-C}_6\text{H}_4(\text{PMe}_2)_2\}_2][\text{NbOCl}_4(\text{MeCN})]$ , ellipsoids are drawn at the 40% Level. Selected bond lengths ( $\text{\AA}$ ) and angles ( $^\circ$ ) Cation:  $\text{Nb1-Cl2} = 2.4378(17)$ ,  $\text{Nb1-Cl4} = 2.4385(17)$ ,  $\text{Nb1-Cl3} = 2.4392(17)$ ,  $\text{Nb1-Cl1} = 2.4444(17)$ ,  $\text{Nb1-P4} = 2.6772(18)$ ,  $\text{Nb1-P1} = 2.6824(19)$ ,  $\text{Nb1-P2} = 2.6884(18)$ ,  $\text{Nb1-P3} = 2.6904(18)$ ,  $\text{Cl2-Nb1-Cl4} = 92.67(6)$ ,  $\text{Cl2-Nb1-Cl3} = 95.36(6)$ ,  $\text{Cl4-Nb1-Cl1} = 96.76(6)$ ,  $\text{Cl3-Nb1-Cl1} = 95.11(6)$ ,  $\text{P1-Nb1-P2} = 72.57(5)$ ,  $\text{P4-Nb1-P3} = 72.76(5)$ ,  
Anion:  $\text{Nb2-O1} = 1.700(4)$ ,  $\text{Nb2-Cl8} = 2.3836(17)$ ,  $\text{Nb2-Cl6} = 2.3893(17)$ ,  $\text{Nb2-Cl5} = 2.4090(18)$ ,  $\text{Nb2-Cl7} = 2.4113(18)$ ,  $\text{Nb2-N1} = 2.474(6)$ ,  $\text{O1-Nb2-Cl8} = 98.05(15)$ ,  $\text{O1-Nb2-Cl6} = 97.35(15)$ ,  $\text{O1-Nb2-Cl5} = 97.81(16)$ ,  $\text{Cl8-Nb2-Cl5} = 88.55(7)$ ,  $\text{Cl6-Nb2-Cl5} = 88.73(7)$ ,  $\text{O1-Nb2-Cl7} = 99.90(16)$ ,  $\text{Cl8-Nb2-Cl7} = 88.64(6)$ ,  $\text{Cl6-Nb2-Cl7} = 89.35(6)$ .

Table S1 X-Ray crystallographic data.

| Compound          | $[\text{NbCl}_4\{\text{o-C}_6\text{H}_4(\text{AsMe}_2)_2\}_2][\text{NbCl}_5(\text{OEt})]$ | $[\text{NbCl}_4\{\text{o-C}_6\text{H}_4(\text{PMe}_2)_2\}_2][\text{NbOCl}_4(\text{CH}_3\text{CN})] \cdot 0.5\text{CH}_2\text{Cl}_2$ |
|-------------------|-------------------------------------------------------------------------------------------|-------------------------------------------------------------------------------------------------------------------------------------|
| Formula           | $\text{C}_{22}\text{H}_{37}\text{As}_4\text{Cl}_9\text{Nb}_2\text{O}$                     | $\text{C}_{22.5}\text{H}_{36}\text{Cl}_9\text{NNb}_2\text{OP}_4$                                                                    |
| $M$               | 1122.07                                                                                   | 965.27                                                                                                                              |
| Crystal system    | triclinic                                                                                 | orthorhombic                                                                                                                        |
| Space group (no.) | P-1 (no. 2)                                                                               | Pbcn (no. 60)                                                                                                                       |
| $a/\text{\AA}$    | 12.144(4)                                                                                 | 15.733(2)                                                                                                                           |
| $b/\text{\AA}$    | 12.649(4)                                                                                 | 14.914(2)                                                                                                                           |
| $c/\text{\AA}$    | 14.145(5)                                                                                 | 32.080(5)                                                                                                                           |
| $\alpha/^\circ$   | 108.902(15)                                                                               | 90                                                                                                                                  |
| $\beta/^\circ$    | 108.00(3)                                                                                 | 90                                                                                                                                  |

|                                          |                |                |
|------------------------------------------|----------------|----------------|
| $\gamma/^\circ$                          | 102.027(5)     | 90             |
| $U/\text{\AA}^3$                         | 1836.4(11)     | 7527.2(18)     |
| $Z$                                      | 2              | 8              |
| $\mu(\text{Mo-K}_\alpha)/\text{mm}^{-1}$ | 4.874          | 1.439          |
| $F(000)$                                 | 1088           | 3848           |
| Total number reflns                      | 17441          | 29471          |
| $R_{\text{int}}$                         | 0.0418         | 0.0871         |
| Unique reflns                            | 8354           | 7372           |
| No. of params, restraints                | 343, 0         | 366, 0         |
| $R_1, wR_2 [I > 2\sigma(I)]$             | 0.0507, 0.0745 | 0.0745, 0.1024 |
| $R_1, wR_2$ (all data)                   | 0.0623, 0.0791 | 0.1042, 0.1111 |

#### References.

S1. J. C. Dewan, D. L. Kepert, C. L. Raston and A. H. White, *J. Chem. Soc., Dalton Trans.*, 1975, 2031.
